# Supplementary material for: Polyphenolic Compounds Inhibit Osteoclast Differentiation While Reducing Autophagy through Limiting ROS and the Mitochondrial Membrane Potential
Source: MDPI journal article supplement (doi:10.3390/biom12091220), 2022-09-01
Supplement: s1 [file s1]

## **Supplementary Figures**

**Polyphenolic Compounds Inhibit Osteoclast Differentiation by Reducing Autophagy through Limiting ROS and the Mitochondrial Membrane Potential**

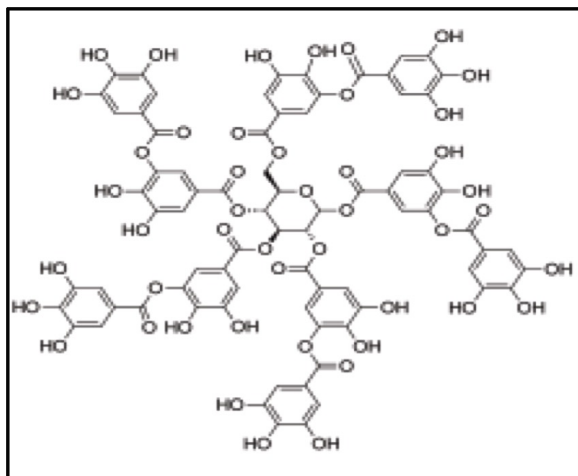

**Tannic Acid (TA)**

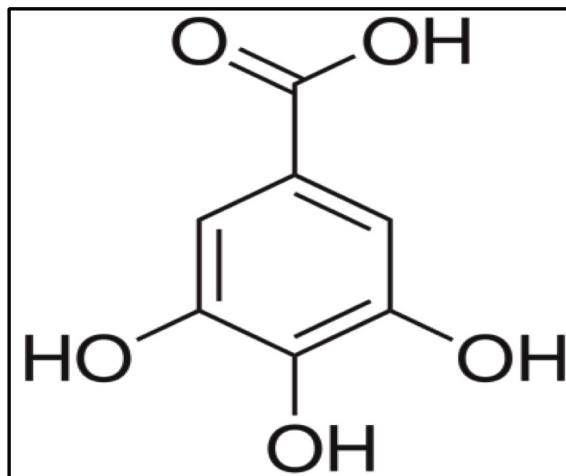

**Gallic Acid (GA)**

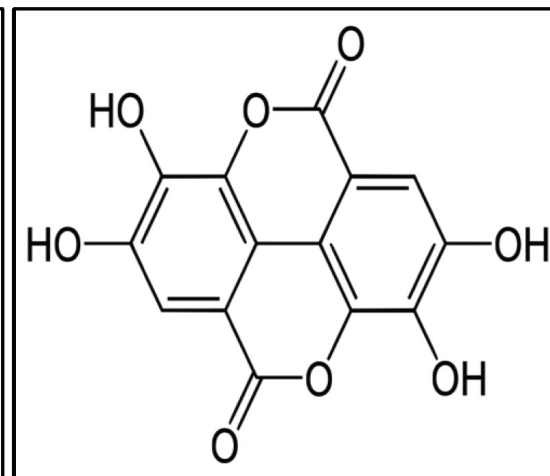

**Ellagic Acid (EA)**

**Figure S1.** Chemical structures of tannic, gallic and ellagic acids are shown.

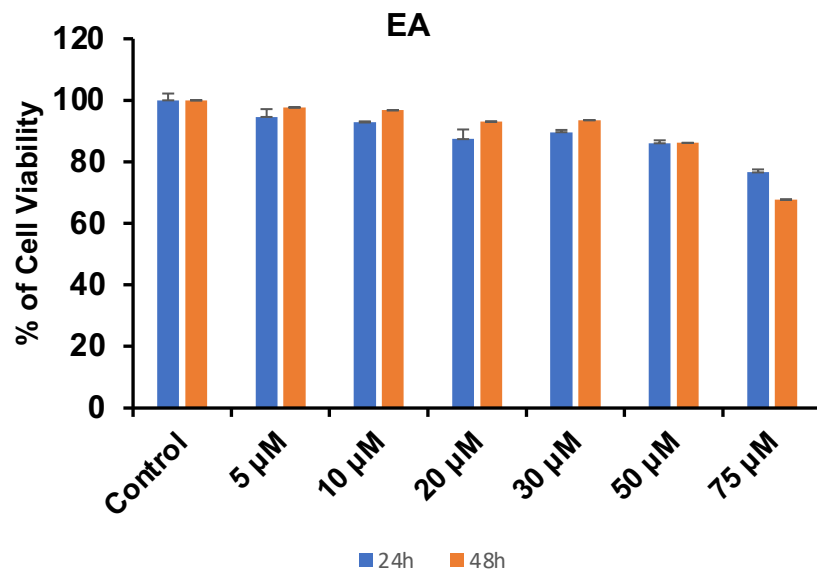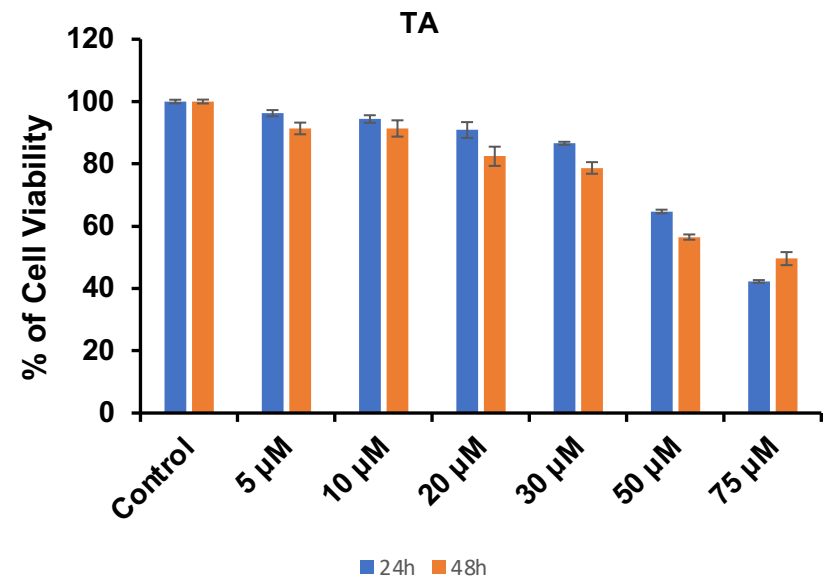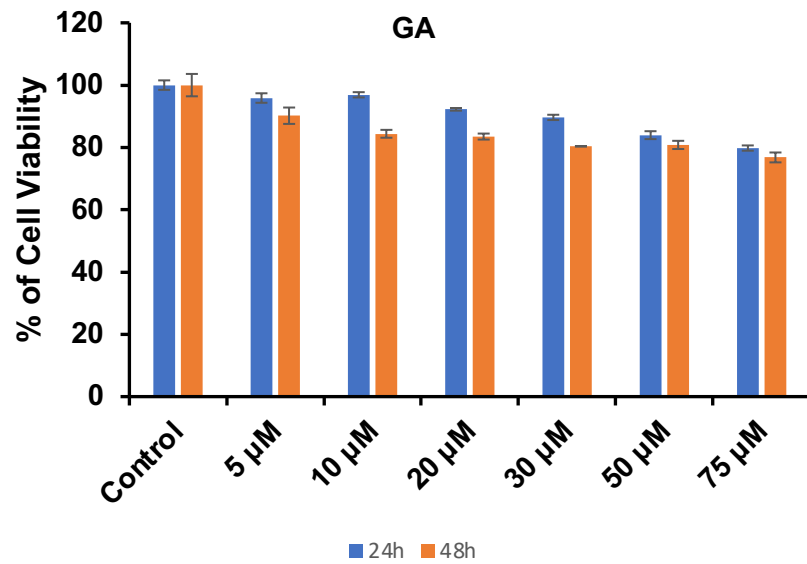

**Figure S2.** Dose-dependent effect of ellagic acid (EA), gallic acid (GA), and tannic acid (TA) on RAW264.7 cell viability are shown graphically.

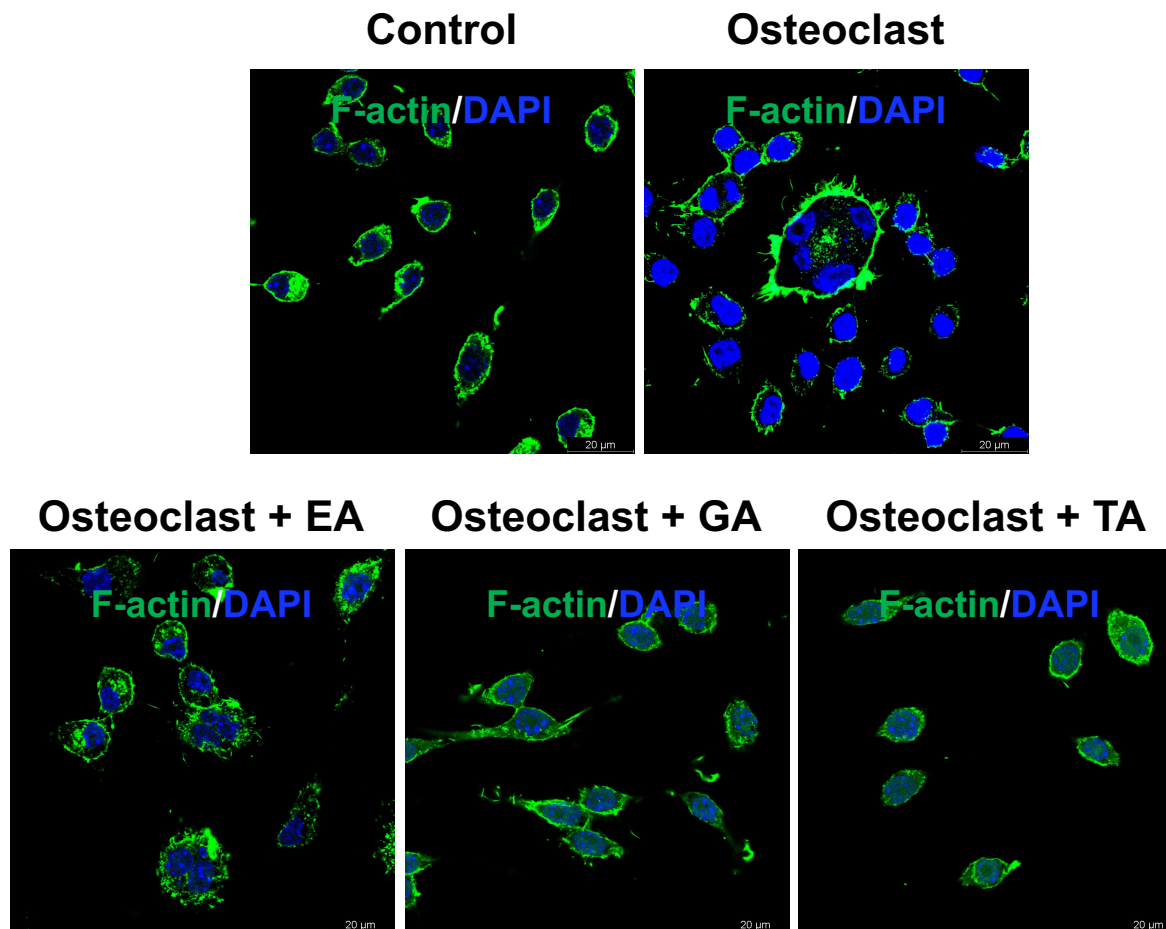

**Figure S3.** The effect of ellagic acid (EA), gallic acid (GA), and tannic acid (TA) on actin ring formation of osteoclasts. RAW264.7 cells ( $1 \times 10^4$  cells/well) were cultured on a coverslip inserted in a well of a 6-well plate and differentiated for 6 days in the presence or absence of polyphenolic compounds. After differentiation, cells were washed with ice-cold 1 x PBS and fixed with 4% PFA for 10 min. Next, cells were permeabilized with 0.1% Triton X-100 for 10 min at room temperature. Cells were then stained for 50 µg/mL FITC-conjugated phalloidin (#P5282; Sigma Aldrich, St Louis, USA) for 45 min at room temperature. Cells were then washed with 1 x PBS 3 times. The coverslips containing cells were then mounted on a slide using DAPI, and the borders were sealed with transparent nail varnish. Imaging was performed under a super-resolution confocal microscope (Leica Stellaris 8 STED, Germany), using a 100x objective, and images were analyzed using LAS X image analysis software. Each experiment was performed in triplicate.

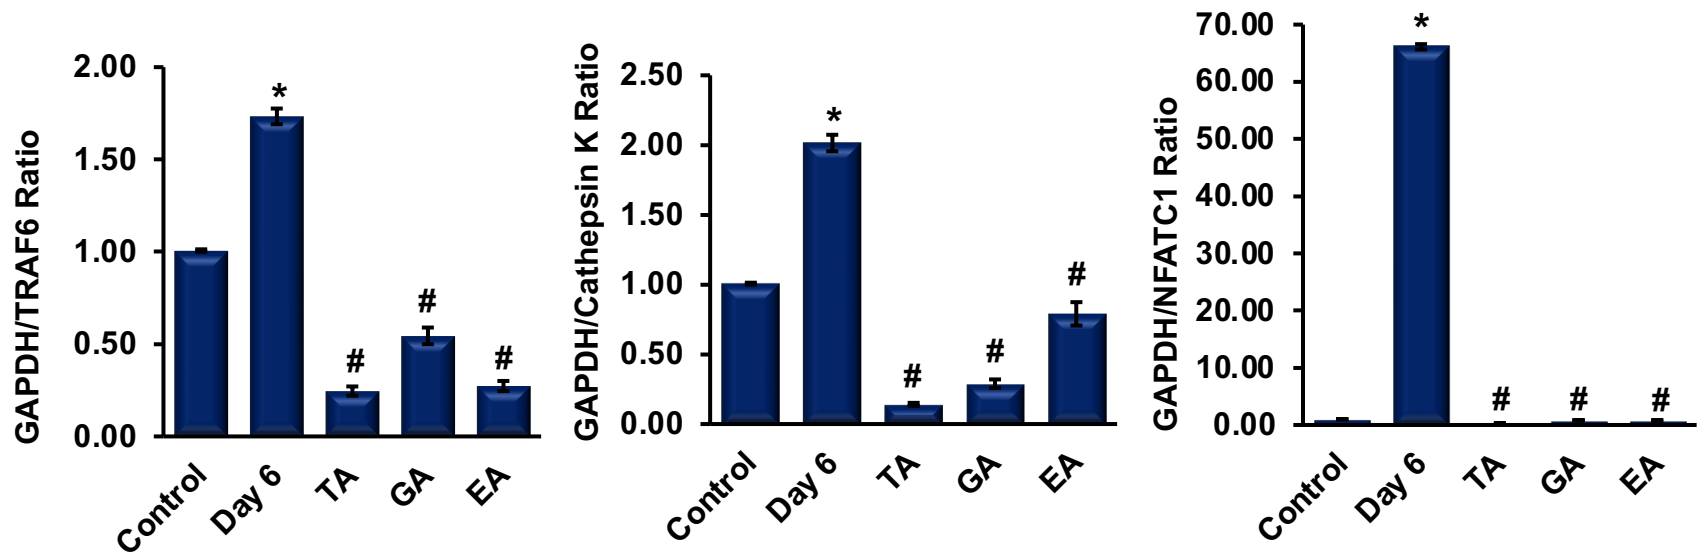

**Figure S4.** Bar graphs showing the quantification of TRAF6, Cathepsin K and NFATC1 compared to the loading control (GAPDH) of Fig. 4A. Star (\*) indicates a statistical significance ( $p < 0.05$ ) when compared to controls with OC differentiated cells (Day 6); and hashtag (#) indicates a statistical significance ( $p < 0.05$ ) compared with differentiated cells respectively after addition of either TA, GA, or EA.

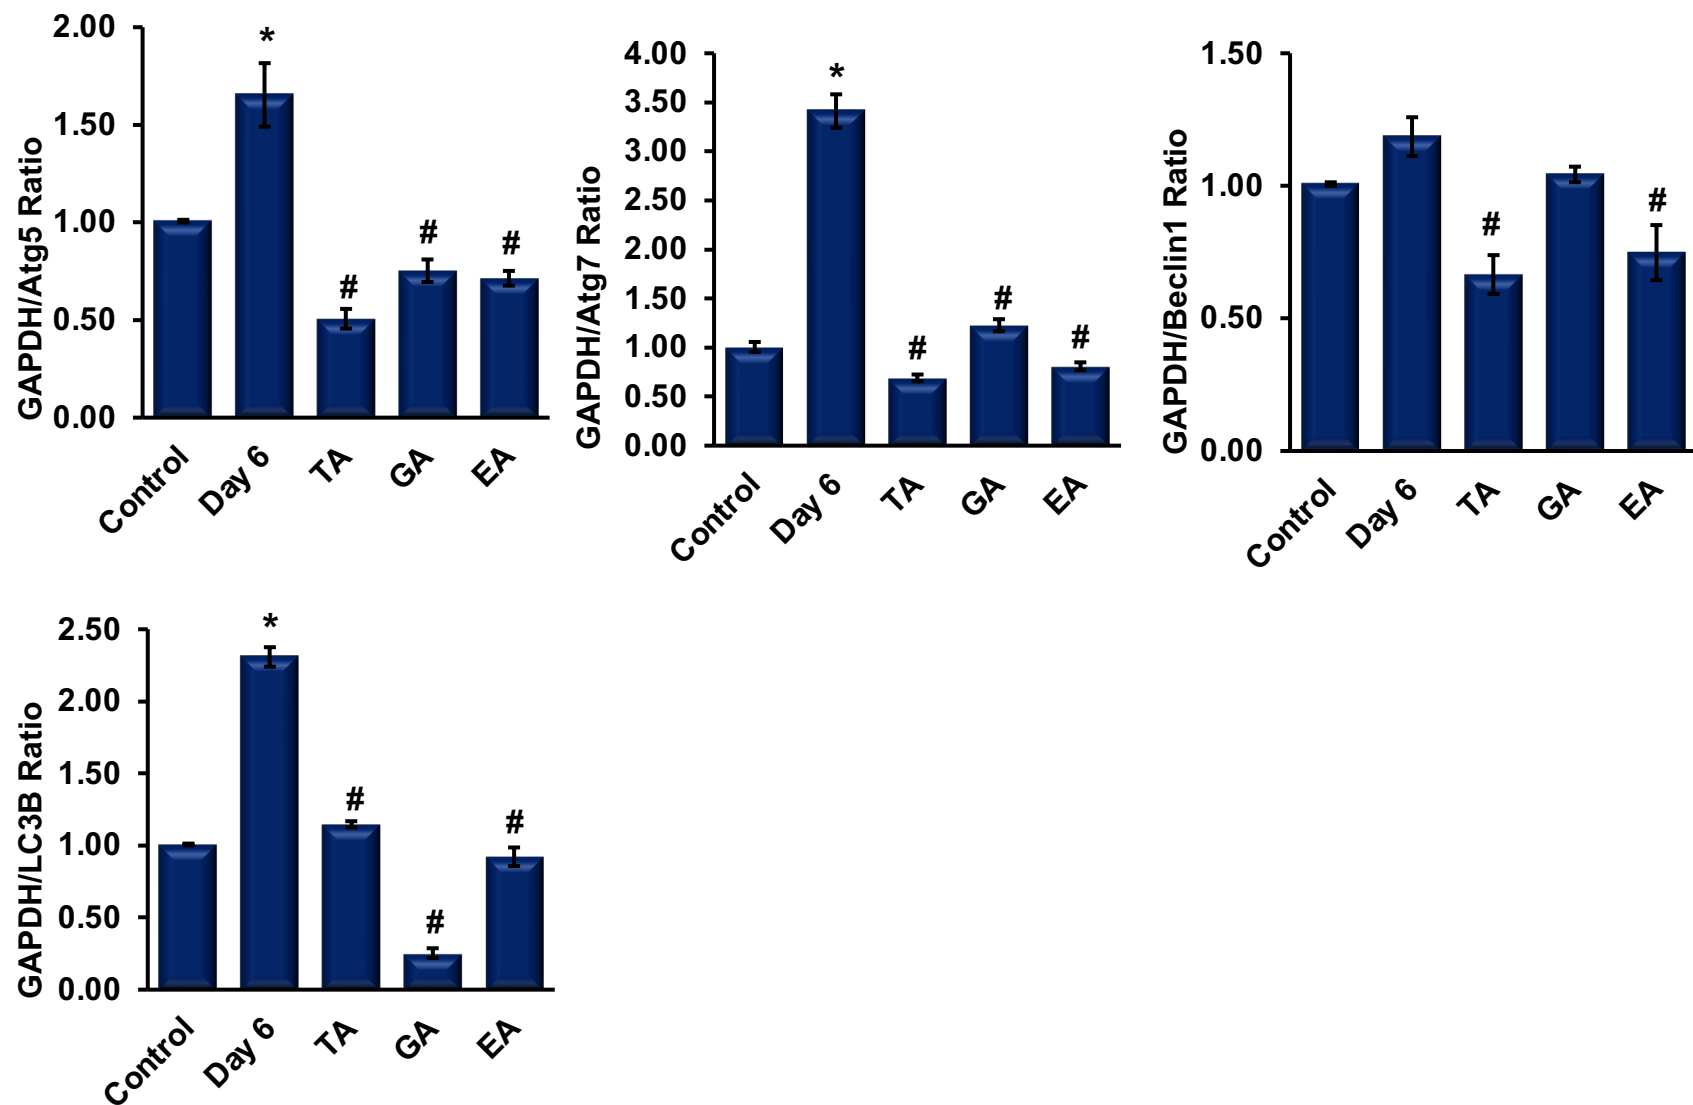

**Figure S5.** Bar graphs showing the quantification of autophagy markers such as ATG5, ATG7, Beclin1, and LC3B compared to the loading control (GAPDH) of Fig. 4B. Star (\*) indicates a statistical significance ( $p < 0.05$ ) when compared to controls with OC differentiated cells (Day 6); and hashtag (#) indicates a statistical significance ( $p < 0.05$ ) compared with differentiated cells respectively after addition of either TA, GA, or EA.

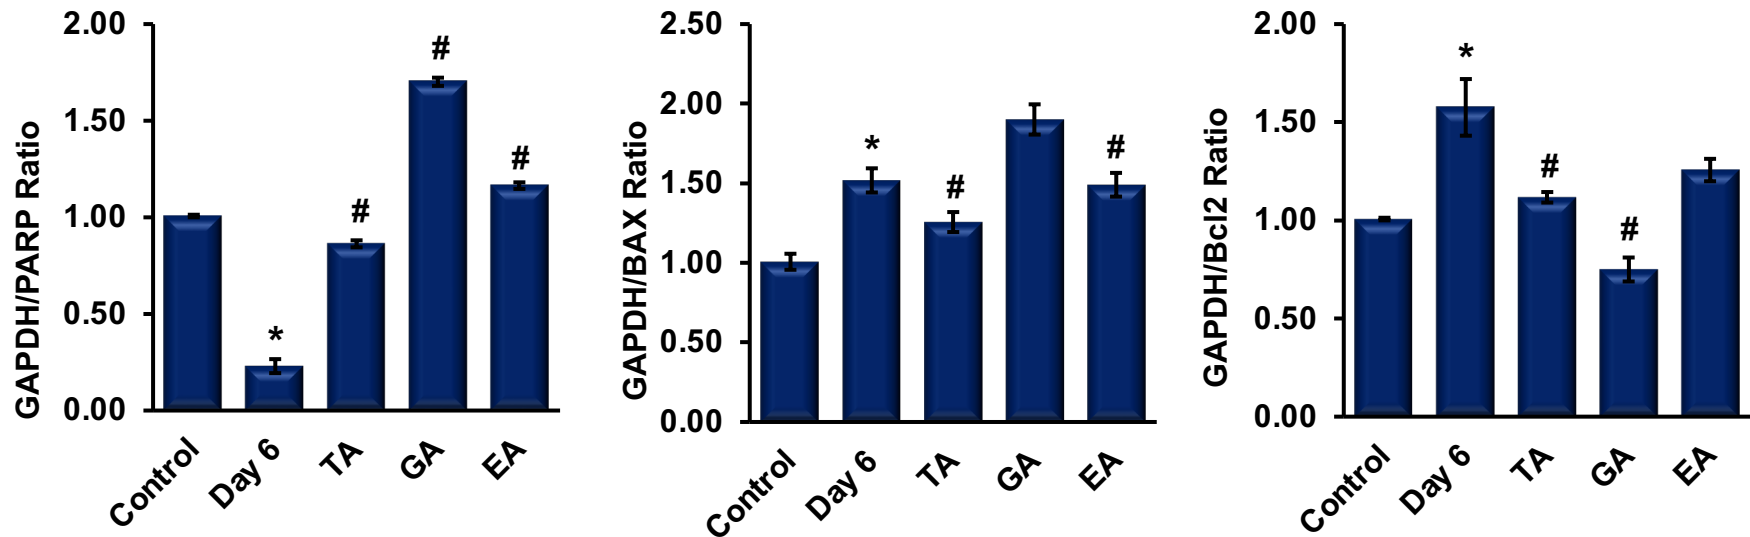

**Figure S6.** Bar graphs showing the quantification of apoptosis and cell survival related molecules such as PARP, BAX, and Bcl2 compared to the loading control (GAPDH) of Fig. 4C. Star (\*) indicates a statistical significance ( $p < 0.05$ ) when compared to controls with OC differentiated cells (Day 6); and hashtag (#) indicates a statistical significance ( $p < 0.05$ ) compared with differentiated cells respectively after addition of either TA, GA, or EA.

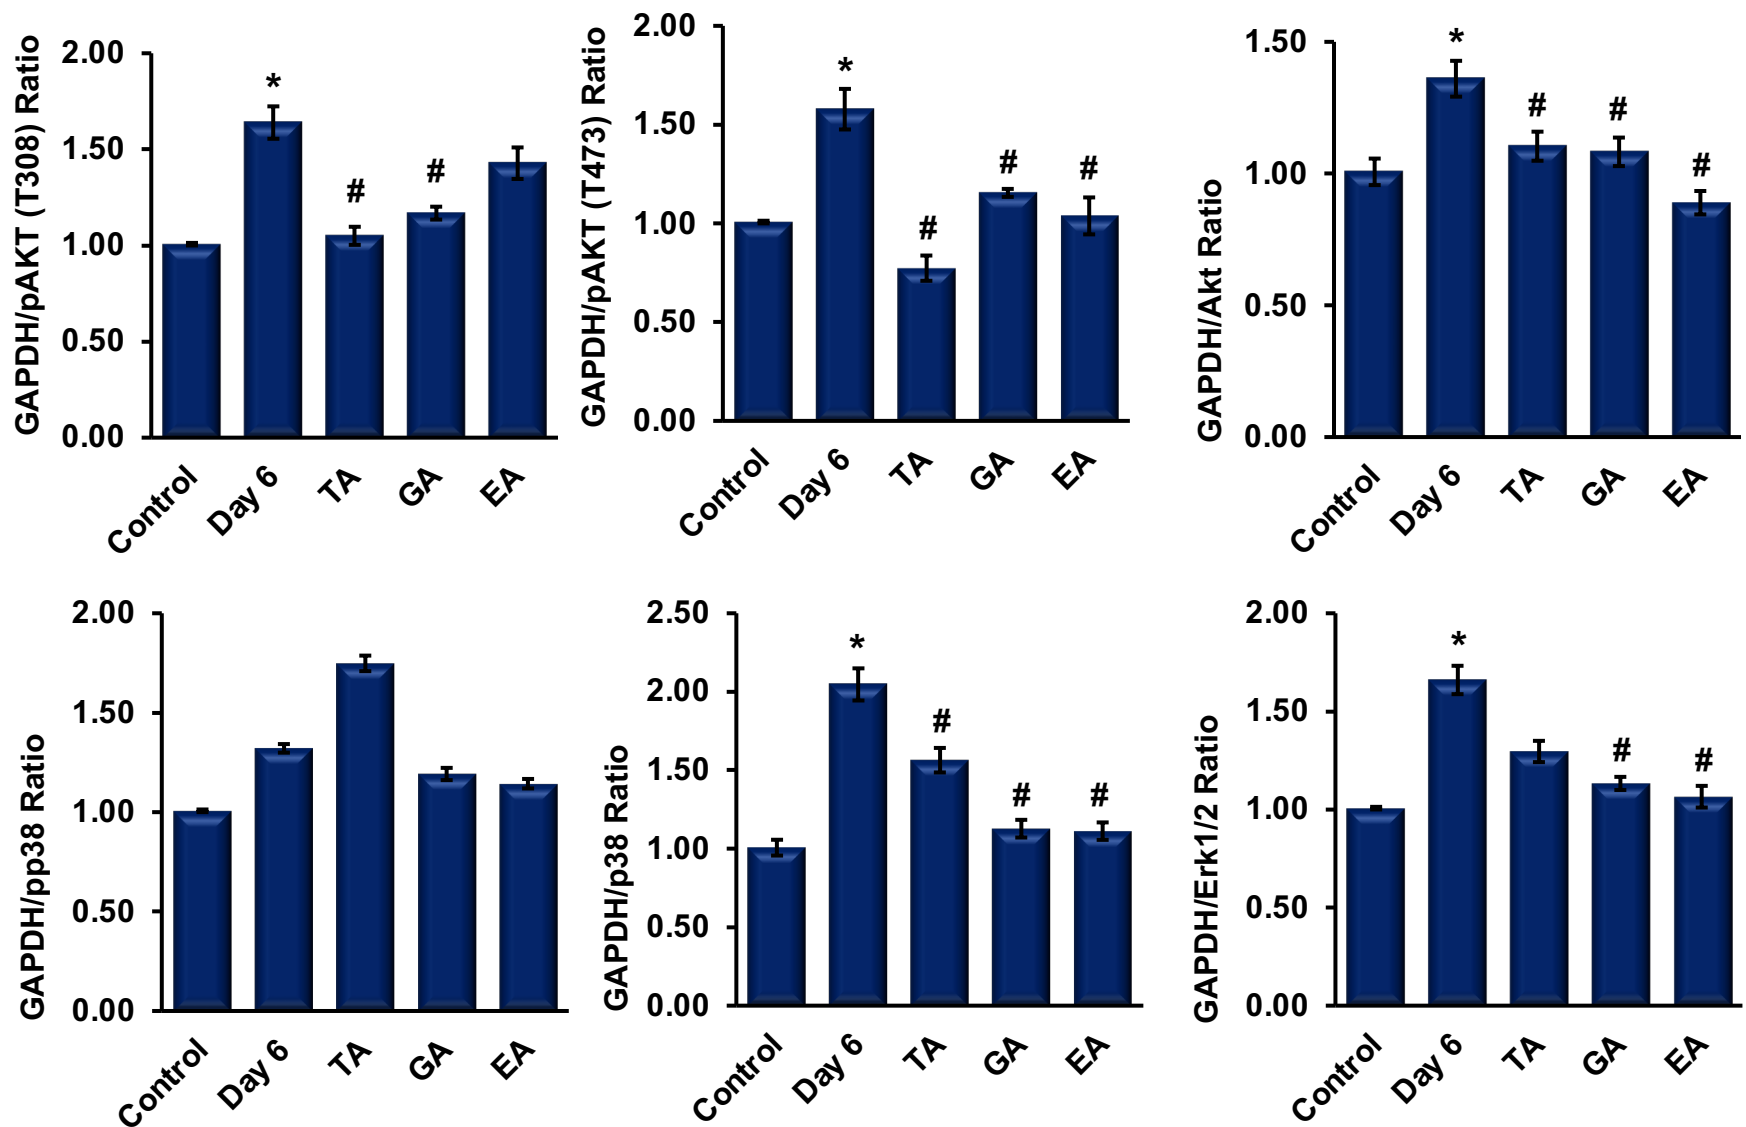

**Figure S7.** Bar graphs showing the quantification of pAKT (T308), pAKT (T473), Akt, pP38, p38, and ERK1/2 compared to the loading control (GAPDH) of Fig. 4D. Star (\*) indicates a statistical significance ( $p < 0.05$ ) when compared to controls with OC differentiated cells (Day 6); and hashtag (#) indicates a statistical significance ( $p < 0.05$ ) compared with differentiated cells respectively after addition of either TA, GA, or EA.
